# Supplementary material for: Targeting IDH1 as a Prosenescent Therapy in High-grade Serous Ovarian Cancer
Source: Oxford University Press journal article supplement (doi:10.1158/1541-7786.mcr-18-1233), 2019-05-20
Supplement: 15417786mcr181233-sup-212284_2_supp_5505747_pr54kw.xlsx [file 15417786mcr181233-sup-212284_2_supp_5505747_pr54kw.xlsx]

## Sheet: Sheet1
qRT-PCR Primers
Gene	Gene Name	Forward 5’ à 3’	Reverse 5’ à 3’
B2M	Beta-2-Microglobulin	GTGCTCGCGCTACTCTCTCT	TCTCTGCTGGATGACGTGAG
IDH1	Isocitrate dehydrogenase I	TGGCTTCATGACCAAGGAC	TTGGCCTGAGCTAGTTTGATC
CCNA2	Cyclin A2	CGAAAGACTGGATATACCCTGG	CATCTTAGAAAACAAAGGCAGTCT
PCNA	Proliferating cell nuclear antigen	ATGTCGATAAAGAGGAGGAAG C	GTATTTTAAGTGTCCCATATCCGC
MCM3	Minichromosome maintenance complex component 3	AGAAAAGCCAAGAGGACCAG	AACCTGGATTCACTCAACTCC
IDH2	Isocitrate dehydrogenase 2	AGTCTTCGGGTGGCTTTG	CCTCAATCGTCTTCCCATCAG
IDH3α	Isocitrate dehydrogenase 3α	GACACCAAGTGGCAACATTG	ATTGTAGCAAAACACGCAGC
IDH3β	Isocitrate dehydrogenase 3β	AGTTTGATGTGCTTGTGATGC	CCGTGGGATTGGCTATATTCC
IDH3γ	Isocitrate dehydrogenase 3γ	AGTGGACTTTGAAGAGGTGC	TCTTACAGTGGATGACGTTGG
ME1	Malic enzyme 1	ACCTGATTGTGATGGCCTTG	AGGGCAGTTGGTTTTATTTCTTG
ME2	Malic enzyme 2	GCCGTCTTTTCACTCCTGATG	TCGCCCATCTGTAAGTTTCAC
ME3	Malic enzyme 3	ATACGATGACTTGCTGGATGAG	CCAAGATCCCTGCCACAG
FH	Fumarate hydratase	TCTCTAATGTTGGTGACAGCTC	ACCCATTCGTCAAACTGCTC
SUCLA2	Succinate-CoA ligase ADP-formaing beta subunit	AGCGGACAGTGGACTTAAAATAC	TTCGCTAAGGTCACTATTTCAGAG
SUCLG1	Succinate-CoA ligase alpha subunit	TTCAGAGTGCAGGAGTTGTG	ATGTCTACGTGATCCATTCCAC
SUCLG2	Succinate-CoA Ligase GDP-Forming Beta Subunit	GATGACAACGCAGAATTCCG	GAGCCCAGCACCATTCA
CS	Citrate synthase	TTAGAGCAGGGTAAAGCCAAG	CCAGTACACCCAATGCTCG
OGDH	Oxoglutarate dehydrogenase	AGGAGCACAAGAACCAAGG	TCAGGTGGGTCTTCTTGTTG
DLTS	Dihydrolipoamide S- Succinyltransferase	TCGCTCTTTGGAACACCC	GTGATCATAGGTCAGTGCCAC
SDHA	Succinate Dehydrogenase Complex Flavoprotein Subunit A	CATAAGAACATCGGAACTGCG	CTTCAGGTGCTTTAGGTCTCC
SDHB	Succinate dehydrogenase iron-sulfur subunit B	CTCCAGAGATGACTTCACAGAG	TCTGCAATAGCTTTCCCTGG
SDHC	Succinate Dehydrogenase Complex, Subunit C, Integral Membrane Protein,	TTGTGAAGTCCCTGTGTCTG	GGCTGGAGATAAGAATGACAAAC
SDHD	Succinate Dehydrogenase Cytochrome B Small Subunit	TGAATCCTTGCTCTGCGATG	TGCCCACATCGTGATAGTTG
PDHA1	Pyruvate Dehydrogenase E1 Alpha 1 Subunit	AGTAAGAGTGACCCTATTATGCTTC	CCTTCCTCACTTCCACATCAA
DLAT	Dihydrolipoamide S-Acetyltransferase	CCCACCTCAAGCATGTATTTTG	GGCTCCAACTGCTCCATC
DLD	Dihydrolipoamide Dehydrogenase	TCCTTGGGCAGAAATCGAC	GGATGTGCATGACAGACTCTAG
MDH1	Malate Dehydrogenase 1	AGGGACATCTGGTTTGGAAC	TCAGTTCCTTTGCAGTAAGATCC
MDH2	Malate Dehydrogenase 2	GAATGTACCTACTTCTCCACACC	AGACTTTGCCGATGCCC
Aco1	Aconitase 1	CAAAACTAGCCTGTCTCCTGG	CTCCAACAGCTACAAGGTCTC
Aco2	Aconitase 2	ACAAGATTCACCCTGTGGAC	TCTCGTTGAAGGTGTGGTTC
PDK1	Pyruvate Dehydrogenase Kinase 1	GGCTGGTTTTGGTTATGGATTG	CTGGGAGTCTTTCTATTGAGTCTG
IL6	Interleukin 6	GCCCAGCTATGAACTCCTTCT	GAAGGCAGCAGGCAACAC
IL8	Interleukin 8	AGACAGCAGAGCACACAAGC	ATGGTTCCTTCCGGTGGT
IL1α	Interleukin 1 alpha	GGTTGAGTTTAAGCCAATCCA	TGCTGACCTAGGCTTGATGA
IL1β	Interleukin 1 beta	CTGTCCTGCGTGTTGAAAGA	TTGGGTAATTTTTGGGATCTACA
LMNB1	Lamin B1	TGGAGTGGTTGTTGAGGAAG	GAGAAGGCTCTGCACTGTATAC
ChIP-qPCR primers
Gene	Gene Name	Forward Primer 5’à3’	Reverse Primer 5’à3’
PCNA	Proliferating cell nuclear antigen	GCATGGACACGATTGGCCCT	CTCGAACATGGTGGCGGAGT
MCM3	Minichromosome maintenance complex component 3	TCTTTGGCAGCGGGCAT	CGCAGCTCCACATCGTCC
MKI67	Marker of proliferation KI67	CAGTCCCCGCTGCTCCCGCC	GCTGACGCTGCGGGCGGGCG
MCM2	Minichromosome maintenance complex component 2	TGGCGGAGAGGATCGTGGTA	CTGGGGCCCAGCCTCACCCA
CCNA2	Cyclin A2	CGCTGCCTTTTCCGGGTTGA	CCGGGAGCAGTGATGTTGGG
CDC45	Cell Division Cycle 45	CAATGTGGCCCAATCAGAAA	GCCTGGCGCTCGCGCTGAGG
STMN1	Stathmin 1	CGACAAGATTTAAGAAAAGC	CGGGGCCAGGGGCCGGAGCG
CDC25A	Cell Division Cycle 25A	GCGGGTGTGCGGACCCTCCA	CCGACCCGCCACGTTTGTTTG
Gene Desert		TGCCCTTGGCACAGATTCTT	GGGGTGAGGTCAAGGTCAAG
PCR primers
Description	Forward Primer 5’à3’	Reverse Primer 5’à3’
IDH1 mutation R132	AATGAGCTCTATATGCCATCACTG	TTCATACCTTGCTTAATGGGTGT
